# Supplementary material for: The wasted chewing gum bacteriome
Source: PubMed Central journal article supplement (PMC7545173; doi:10.1038/s41598-020-73913-4), 2020-10-08
Supplement: 41598_2020_73913_MOESM1_ESM.pdf [file 41598_2020_73913_MOESM1_ESM.pdf]

## **Supplementary material**

**Leila Satari, Alba Guillén, Àngela Vidal-Verdú and Manuel Porcar. “The wasted chewing gum bacteriome”**

## Supplementary Figures

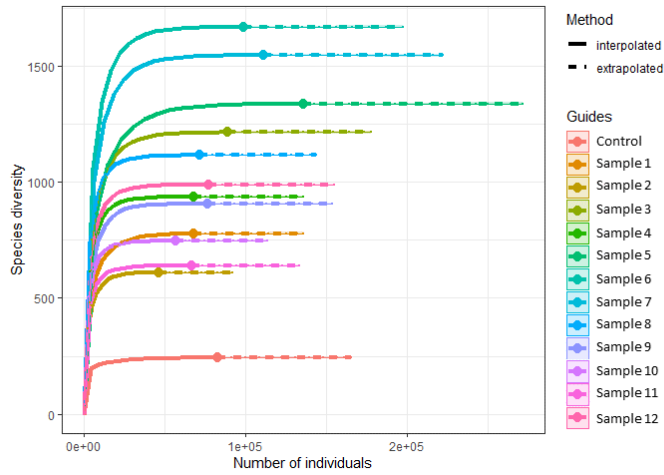

**Supplementary Figure 1.** Rarefaction curves at OTU level were plotted in order to assess the depth of the 16S sequencing process and observed the species diversity in each sample.

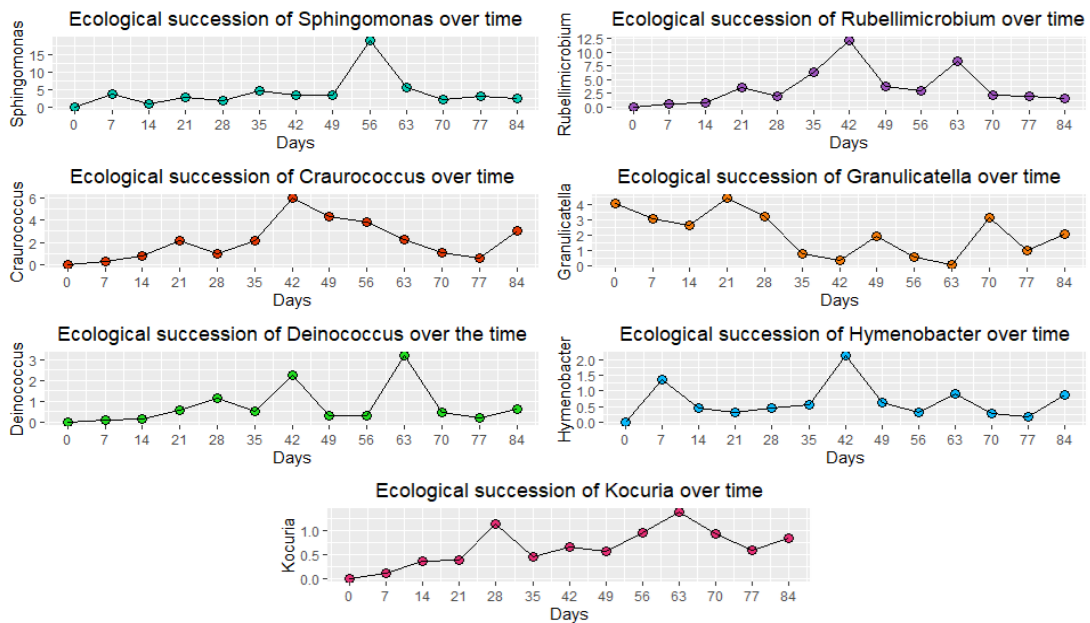

**Supplementary Figure 2.** Ecological succession of most abundant environmental genera in a dynamic study.

## Supplementary Tables

**Supplementary Table 1.** Identification of wasted chewing gum aerophilic isolates.

| ISOLATE       | SIMILARITY (%) | IDENTIFICATION                     |
|---------------|----------------|------------------------------------|
| SAMPLE1- NO1  | 98.45          | <i>Curtobacterium herbarum</i>     |
| SAMPLE1- NO2  | 98.60          | <i>Pantoea vagans</i>              |
| SAMPLE1- NO3  | 99.86          | <i>Microbacterium arborescens</i>  |
| SAMPLE1- NO4  | 99.62          | <i>Pseudomonas oryzihabitans</i>   |
| SAMPLE1- NO5  | 99.16          | <i>Paenibacillus illinoisensis</i> |
| SAMPLE1- NO6  | 99.07          | <i>Microbacterium aerolatum</i>    |
| SAMPLE2- NO1  | 99.28          | <i>Arthrobacter tumbae</i>         |
| SAMPLE2- NO2  | 99.69          | <i>Serinicoccus sediminis</i>      |
| SAMPLE2- NO3  | 99.50          | <i>Arthrobacter ruber</i>          |
| SAMPLE2- NO4  | 98.77          | <i>Sphingomonas insulae</i>        |
| SAMPLE2- NO5  | 99.12          | <i>Serinicoccus profundus</i>      |
| SAMPLE2- NO6  | 99.58          | <i>Arthrobacter agilis</i>         |
| SAMPLE2- NO7  | 97.91          | <i>Aureimonas phyllosphaerae</i>   |
| SAMPLE3- NO1  | 99.75          | <i>Bacillus altitudinis</i>        |
| SAMPLE3- NO17 | 98.84          | <i>Agrococcus jenensis</i>         |
| SAMPLE3- NO18 | 99.31          | <i>Williamisia marianensis</i>     |

**Supplementary Table 2.** Identification of wasted chewing gum microaerophilic isolates.

| ISOLATE             | SIMILARITY (%) | IDENTIFICATION                      |
|---------------------|----------------|-------------------------------------|
| MICROAEROPHILE- NO1 | 99.51          | <i>Arthrobacter ruber</i>           |
| MICROAEROPHILE- NO2 | 99.18          | <i>Cellulosimicrobium cellulans</i> |
| MICROAEROPHILE- NO3 | 98.90          | <i>Sphingomonas insulae</i>         |
| MICROAEROPHILE- NO4 | 99.59          | <i>Terribacillus goriensis</i>      |
| MICROAEROPHILE- NO5 | 99.54          | <i>Bacillus simplex</i>             |
